# Supplementary material for: Verification of Resveratrol Inhibits Intestinal Aging by Downregulating ATF4/Chop/Bcl-2/Bax Signaling Pathway: Based on Network Pharmacology and Animal Experiment
Source: Front Pharmacol. 2020 Jul 10;11:1064. doi: 10.3389/fphar.2020.01064 (PMC7366860; doi:10.3389/fphar.2020.01064)
Supplement: Supplementary file 4 [file Table_4.xls]

## Sheet: Sheet1
Supplementary Table 4 Common targets of resveratrol and aging
PTGS1
PTGS2
MAOB
NCOA2
RELA
STAT3
AKT1
VEGFA
CCND1
BCL2
BCL2L1
FOS
CDKN1A
EIF6
BAX
CASP9
PLAU
MMP2
MMP9
MAPK3
MAPK1
IL10
TNFSF15
JUN
IL6
AHSA1
CASP3
TP63
MAPK8
NFKBIA
ODC1
BAK1
BBC3
SOD1
CAT
PRKCA
TEP1
HIF1A
IGF1R
STAT1
RUNX1T1
EDN3
FOXO1
PPARG
CTNNB1
MYC
F3
GJA1
CYP1A1
ICAM1
IL1B
CCL2
SELE
VCAM1
PRKCD
CXCL8
MCL1
BRCA1
XRCC6
SOD2
PRKCB
PECAM1
BIRC5
DUOX2
NOS3
PTPN1
CCND2
BCL2A1
ABCB1
HGF
SULT1E1
MGAM
CYP1B1
CCNB1
DDIT3
PLAT
IL1A
MPO
TNFRSF10B
ABCG2
NFE2L2
NQO1
AHR
PRKAG2
SLC2A4
PPARA
CRP
PON1
CD80
CCNE1
CCNE2
BCAM
CREBZF
NTRK1
KLF10
APAF1
ABCC3
SREBF1
ADIPOR1
ADIPOR2
JAK1
AGTR1
IRS1
CFLAR
LGSN
PYGO1
IL17B
MTOR
CCR2
EIF2S1
PTGES
PMAIP1
BCL2L11
TNFSF10
TNFRSF10A
RPS6
GCH1
BIRC3
TRAF2
CDC42
BSG
COL2A1
ITGB1
CD28
NR1H3
PAPPA
SPARC
BRCA2
AAGAB
PRKD1
TGFA
CD320
